# Supplementary material for: Involvement of CsWRKY70 in salicylic acid-induced citrus fruit resistance against Penicillium digitatum
Source: PubMed Central journal article supplement (PMC7527965; doi:10.1038/s41438-020-00377-y), 2020-10-01
Supplement: 41438_2020_377_MOESM1_ESM.pdf [file 41438_2020_377_MOESM1_ESM.pdf]

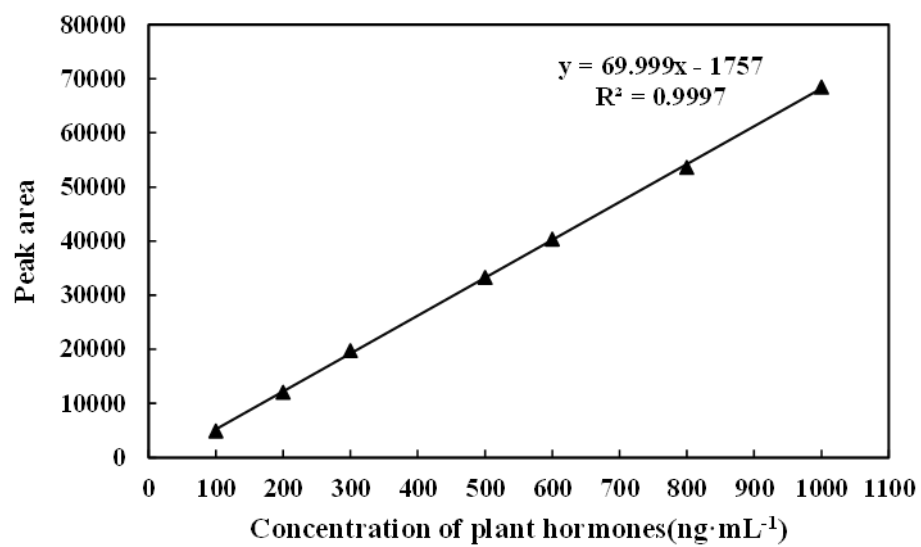

Figure-S1 Calibration curve used for the calculation of MeSA content
